# Supplementary material
Source: MDPI journal article supplement (https://www.mdpi.com/2073-4344/6/1/17)

# Supplementary Materials: Pyrazole Supported Zinc(II) Benzoates as Catalysts for the Ring Opening Copolymerization of Cyclohexene Oxide and Carbon Dioxide

Mapudumo L. Lephoto, Koji Nakano, Divambal Appavoo, Bernard O. Owaga, Kyoko Nozaki and James Darkwa

Table S1. Crystallographic data for complex 2.

| Empirical formula                 | C <sub>44</sub> H <sub>30</sub> N <sub>8</sub> O <sub>12</sub> Zn |
|-----------------------------------|-------------------------------------------------------------------|
| Formula weight                    | 928.13                                                            |
| Temperature                       | 100(2) K                                                          |
| Wavelength                        | 0.71073 Å                                                         |
| Crystal system                    | Monoclinic                                                        |
| Space group                       | P21/c                                                             |
| Unit cell dimensions              |                                                                   |
| $a = 13.9192(8)$ Å                | $\alpha = 90^\circ$                                               |
| $b = 13.7516(7)$ Å                | $\beta = 103.4660(10)^\circ$                                      |
| $c = 21.5005(12)$ Å               | $\gamma = 90^\circ$                                               |
| Z                                 | 4                                                                 |
| Density (calculated)              | 1.540 Mg/m <sup>3</sup>                                           |
| Absorption coefficient            | 0.693 mm <sup>-1</sup>                                            |
| F(000)                            | 1904                                                              |
| Crystal size                      | 0.21 × 0.11 × 0.04 mm <sup>3</sup>                                |
| Theta range for data collection   | 1.50 to 28.34°                                                    |
| Index ranges                      | $-18 \leq h \leq 18, -17 \leq k \leq 18, -28 \leq l \leq 28$      |
| Reflections collected             | 77200                                                             |
| Independent reflections           | 9969 [R(int) = 0.0689]                                            |
| Completeness to theta = 28.34°    | 99.7%                                                             |
| Absorption correction             | Semi-empirical from equivalents                                   |
| Max. and min. transmission        | 0.9728 and 0.8682                                                 |
| Refinement method                 | Full-matrix least-squares on F <sup>2</sup>                       |
| Data / restraints / parameters    | 9969 / 7 / 586                                                    |
| Goodness-of-fit on F <sup>2</sup> | 1.030                                                             |
| Final R indices [I > 2sigma(I)]   | R1 = 0.0402, wR2 = 0.0838                                         |
| R indices (all data)              | R1 = 0.0656, wR2 = 0.0947                                         |
| Largest diff. peak and hole       | 0.529 and -0.582 e.Å <sup>-3</sup>                                |

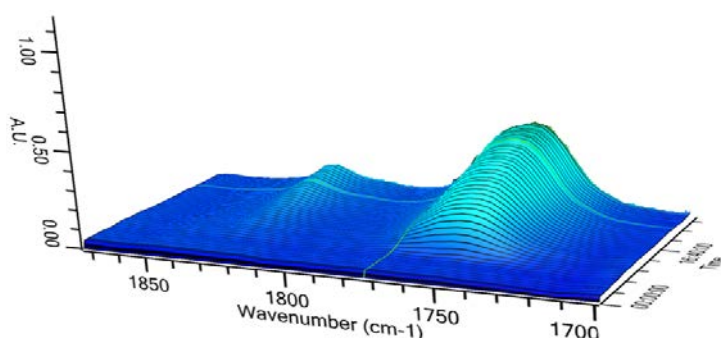

Figure S1. Three-dimensional stack plot of the IR data collected every minute with ReactIR during CHO/CO<sub>2</sub> copolymerisation using catalyst 1.

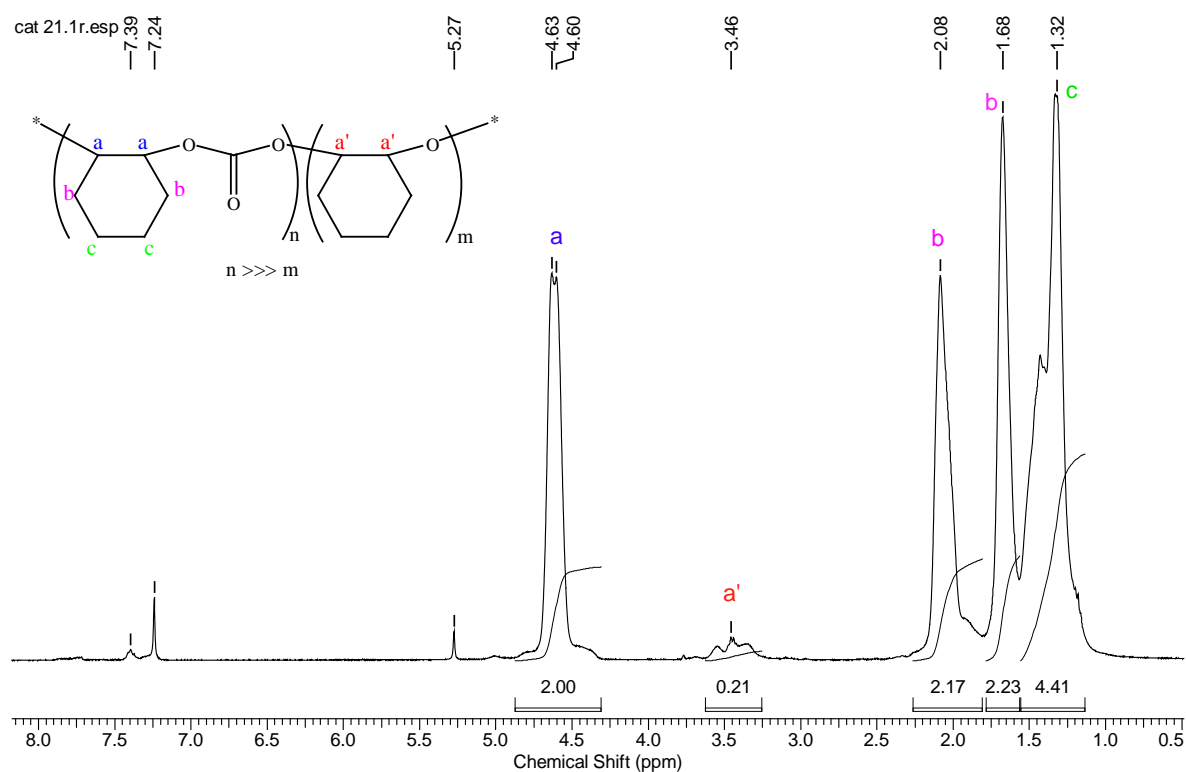

**Figure S2.**  $^1\text{H}$  NMR spectrum of PCHC showing high carbonate content.

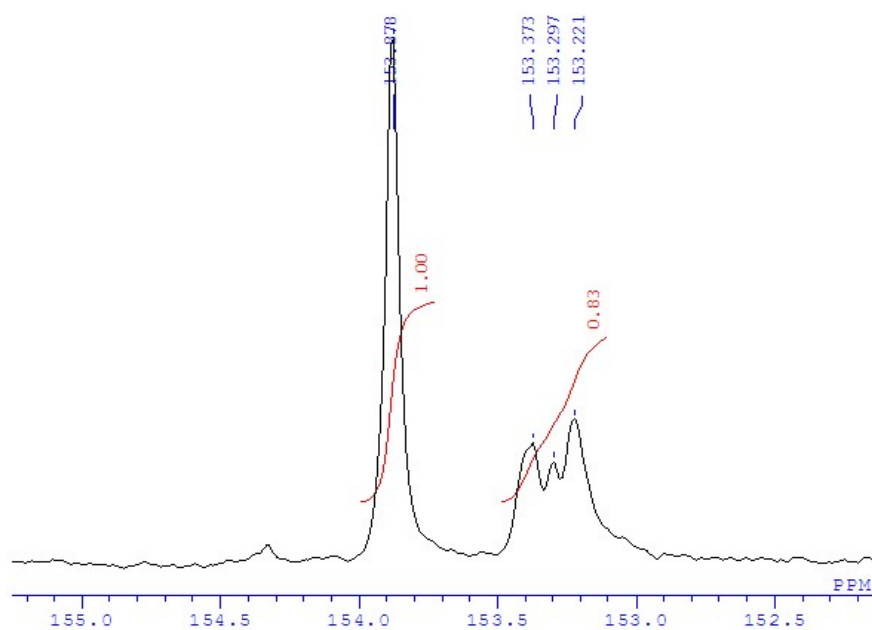

**Figure S3.** Typical  $^{13}\text{C}$  NMR spectrum of PCHC produced using catalysts **1–4** showing the carbonyl region.

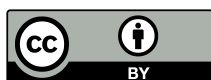

Supplement: s1 [file s1]
